# Supplementary material for: Chemical-induced colitis lowers mitochondrial bioenergetic function in the colonic epithelium with minimal impacts on the proteome
Source: Research Square preprint supplement (doi:10.21203/rs.3.rs-7697508/v1), 2025-10-30
Supplement: Supplementary file 1 [file a720a08c2b3945e47dc1c071.xlsx]

## Sheet: Figure 1C
		Control (JO2)(pmol/sec/mg)
Basal	2.4908	2.35913	2.43608	1.63816
Pyruvate/Malate	3.76268	3.60441	4.13729	3.40346
Cytochrome C	3.42428	4.27362	4.65894	3.58561
ΔGATP-54	14.7287	14.5295	12.1974	16.0367
ΔGATP-59	12.952	13.1928	10.6199	12.5397
ΔGATP-61	12.5031	11.8496	9.1379	11.6355
ΔGATP-62	11.9567	10.9131	8.07865	10.3995
Oligomycin	7.35495	6.56529	4.31187	6.61508
Rotenone/Antimycin A	0.043388	0.831981	0.090741	0.466545

## Sheet: Figure 2A
						Control (JO2)(pmol/sec/mg)															3% DSS (JO2)(pmol/sec/mg)
Basal	2.58823	0.227	2.71538	2.26529	3.10236	2.66256	2.90671	2.03738	4.6346	3.87307	4.06544	2.90182				1.7409	1.56658	2.35715	1.62108	0	2.748	0	0.496148	0.854536	0.997136	0.559926	0.188958
Pyruvate/Malate	5.75182	3.53481	5.80158	4.30664	6.15612	6.26663	4.55846	5.8161	8.64204	8.50755	6.15472	4.16495				3.73862	3.74558	4.82127	2.41362	0.651458	3.37647	0.615375	2.10756	2.06986	2.91891	3.17118	1.84971
Cyt C	6.2525	4.03323	7.08369	4.78996	6.8912	6.70167	4.89611	6.03859	9.64604	9.24662	8.18036	6.19286				4.84695	4.17617	5.51204	2.75611	0.872292	4.00613	1.01275	2.60337	2.05989	3.17027	3.25437	2.27279
ΔGATP-54	10.2155	13.1147	15.9979	14.6025	16.8066	13.6464	15.6194	11.6771	21.239	21.3859	11.0912	10.1248				13.8374	11.0599	9.44519	4.99558	5.59962	8.69247	12.2542	9.65715	2.63361	4.31954	7.28696	6.55754
Glutamate	12.9211	10.9333	14.5192	14.4699	14.5477	12.7352	14.8184	10.6676	20.0958	19.9369	9.86156	7.76477				10.1865	8.89208	8.80142	4.38811	5.01871	9.10093	8.15762	7.1167	3.69054	5.93396	7.11037	6.09396
Octanoyl-Carnitine	13.2781	11.2353	14.178	14.3052	15.418	11.5533	16.5207	10.6242	19.909	19.3165	10.4886	8.04514				9.47633	7.83387	8.185	4.15181	4.47175	10.4931	6.75721	6.847	3.87468	5.93064	7.24252	5.46196
ROT	0	0	1.75508	1.85911	0.32	1.4133	0.320357	0.784793	1.63548	1.10938	1.52908	0.932				1.27662	0.360917	1.96888	0.188615	0.757917	1.87243	0	0.638704	1.69407	1.93432	0.031852	0
Succinate	32.2516	27.2898	29.7354	20.5203	32.3228	20.5448	20.2677	15.4138	24.3927	22.9734	23.2664	20.5275				16.0859	16.3414	14.5314	8.50108	11.3246	17.7283	34.8713	24.1636	6.20296	14.8959	15.8319	22.747
ΔGATP-59	25.2333	21.3513	26.2824	18.7973	24.7712	15.3083	18.9232	13.9019	20.2963	19.2317	20.1386	17.6111				14.783	14.3648	12.6532	10.3001	11.7754	17.379	27.462	20.1139	8.28468	15.6869	14.1531	19.1327
ΔGATP-61	22.4309	18.98	23.1105	17.4236	20.9501	14.0198	16.9314	12.9747	18.7676	17.6115	17.8195	15.6365				11.7915	13.0183	10.9083	8.95777	11.8209	16.1289	27.8522	24.857	8.02989	15.1436	12.1648	17.1418
ΔGATP-62	20.656	17.4781	21.6605	16.8876	17.8471	12.52	16.2504	12.5772	15.96	14.8237	15.77	12.2831				11.9671	10.7415	8.5465	8.12931	11.3385	15.1576	25.9642	24.4037	7.40464	14.6648	12.4594	16.3771
Oligomycin	15.639	13.233	17.6419	15.0607	7.26648	7.64374	12.279	11.0609	12.9467	11.3732	12.6046	11.0675				9.43014	8.73179	7.52504	7.32485	8.91929	11.8411	21.9701	19.4521	7.04368	15.0538	16.5309	20.1594
Malonate	0	0	1.33204	0.941964	1.32312	0.969889	0.808714	1.02372	0	0.516172	0	0				-0.01757	-0.6215	-0.00258	0.052308	7.82754	9.818	0.048417	0.223963	6.19211	12.9693	0.712741	0.4915
Antimycin A	0	0	0	0	0	0	0	0	0	0	0	0				0	0	0	0	0	0	0	0	0	0	0	0
Table Analyzed	OxPhos Kinetics on permeabilized colon strips						Below threshold?	P value	Mean of Control	Mean of 3% DSS	Difference	SE of difference	t ratio	df
						Basal	Yes	0.000402	2.832	1.094	1.737	0.417	4.167	22					P value	Mean of Control	Mean of 3% DSS	Difference	SE of difference	t ratio	df
Column A	Control					Pyr/Mal	Yes	1.8e-05	5.805	2.623	3.182	0.5831	5.457	22				Oct	7e-06	13.74	6.727	7.012	1.205	5.819	22
vs.	vs.					CytC	Yes	1.2e-05	6.663	3.045	3.617	0.6439	5.618	22				CytC	1.2e-05	6.663	3.045	3.617	0.6439	5.618	22
Column B	3% DSS					ΔGATP-54	Yes	0.000192	14.63	8.028	6.598	1.476	4.469	22				Pyr/Mal	1.8e-05	5.805	2.623	3.182	0.5831	5.457	22
						Glut	Yes	2.2e-05	13.61	7.041	6.565	1.224	5.365	22				Glut	2.2e-05	13.61	7.041	6.565	1.224	5.365	22
Test details						Oct	Yes	7e-06	13.74	6.727	7.012	1.205	5.819	22				ΔGATP-54	0.000192	14.63	8.028	6.598	1.476	4.469	22
Test name	Unpaired t test					Rot	No	0.801289	0.9715	0.8937	0.07785	0.3056	0.2547	22				Basal	0.000402	2.832	1.094	1.737	0.417	4.167	22
Variance assumption	Individual variance for each row					Succ	Yes	0.013449	24.13	16.94	7.19	2.675	2.688	22				Succ	0.013449	24.13	16.94	7.19	2.675	2.688	22
Multiple comparisons	Set P value threshold					ΔGATP-59	Yes	0.01907	20.15	15.51	4.646	1.837	2.53	22				ΔGATP-59	0.01907	20.15	15.51	4.646	1.837	2.53	22
Method	No correction for multiple comparisons					ΔGATP-61	No	0.112606	18.05	14.82	3.237	1.959	1.653	22
Alpha	0.05					ΔGATP-62	No	0.245635	16.23	13.93	2.297	1.925	1.193	22
						Oligo	No	0.780023	12.32	12.83	-0.5138	1.817	0.2827	22
Number of tests performed	13					Malo	No	0.075941	0.5763	3.141	-2.565	1.377	1.863	22
Number of rows omitted	1					Ant A			0	0	0	0

## Sheet: Figure 2B
Control (JO2)(pmol/sec/mg)	3% DSS (JO2)(pmol/sec/mg)
8.7	29.65
14.1	11.5
22.1	14.33
11.22	14.19
11.94	33.9
6.94	18.65
7.41	64.57
3.83	23.53
11.62	-0.48
8.69	8.61
32.91	2.62
48.69	22.87
Table Analyzed	Cyt C Effect
Column B	3% DSS
vs.	vs.
Column A	Control
Unpaired t test
P value	0.4644
P value summary	ns
Significantly different (P < 0.05)?	No
One- or two-tailed P value?	Two-tailed
t, df	t=0.7445, df=22
How big is the difference?
Mean of column A	15.68
Mean of column B	20.33
Difference between means (B - A) ± SEM	4.649 ± 6.244
95% confidence interval	-8.301 to 17.60
R squared (eta squared)	0.02458
F test to compare variances
F, DFn, Dfd	1.762, 11, 11
P value	0.3615
P value summary	ns
Significantly different (P < 0.05)?	No
Data analyzed
Sample size, column A	12
Sample size, column B	12

## Sheet: Figure 2C
Control (JO2)(pmol/sec/mg)	3% DSS (JO2)(pmol/sec/mg)
13.2781	12.5608
13.1147	10.699
14.2428	7.47631
12.7433	4.80696
16.4866	4.84171
12.2331	8.62064
16.2004	12.2542
10.8923	9.01844
19.6036	2.18061
20.2765	3.99964
9.56216	7.25511
9.19282	6.55754
Table Analyzed	Max CI
Column B	3% DSS
vs.	vs.
Column A	Control
Unpaired t test
P value	0.0001
P value summary	***
Significantly different (P < 0.05)?	Yes
One- or two-tailed P value?	Two-tailed
t, df	t=4.621, df=22
How big is the difference?
Mean of column A	13.99
Mean of column B	7.523
Difference between means (B - A) ± SEM	-6.463 ± 1.398
95% confidence interval	-9.363 to -3.563
R squared (eta squared)	0.4926
F test to compare variances
F, DFn, Dfd	1.191, 11, 11
P value	0.7769
P value summary	ns
Significantly different (P < 0.05)?	No
Data analyzed
Sample size, column A	12
Sample size, column B	12

## Sheet: Figure 2D
Control (JO2)(pmol/sec/mg)	3% DSS (JO2)(pmol/sec/mg)
32.2516	16.1035
27.2898	16.9629
28.4033	14.534
19.5783	8.44877
30.9997	3.49709
19.5749	7.9103
19.459	34.8229
14.3901	23.9397
24.3927	0.010857
22.4572	1.92668
23.2664	15.1191
20.5275	22.2555
Table Analyzed	Max CII
Column B	3% DSS
vs.	vs.
Column A	Control
Unpaired t test
P value	0.0075
P value summary	**
Significantly different (P < 0.05)?	Yes
One- or two-tailed P value?	Two-tailed
t, df	t=2.947, df=22
How big is the difference?
Mean of column A	23.55
Mean of column B	13.79
Difference between means (B - A) ± SEM	-9.755 ± 3.310
95% confidence interval	-16.62 to -2.890
R squared (eta squared)	0.283
F test to compare variances
F, DFn, Dfd	3.635, 11, 11
P value	0.0426
P value summary	*
Significantly different (P < 0.05)?	Yes
Data analyzed
Sample size, column A	12
Sample size, column B	12

## Sheet: Figure 3A
See supplementary table 1 for proteomics data

## Sheet: Figure 3B
Control	3% DSS
0.178822	0.157396
0.156025	0.139505
0.175864	0.16867
0.163991	0.150086
0.165232	0.171967
Table Analyzed	MEF
Column B	3% DSS
vs.	vs.
Column A	Control
Unpaired t test
P value	0.1884
P value summary	ns
Significantly different (P < 0.05)?	No
One- or two-tailed P value?	Two-tailed
t, df	t=1.438, df=8
How big is the difference?
Mean of column A	0.168
Mean of column B	0.1575
Difference between means (B - A) ± SEM	-0.01046 ± 0.007277
95% confidence interval	-0.02724 to 0.006317
R squared (eta squared)	0.2054
F test to compare variances
F, DFn, Dfd	2.060, 4, 4
P value	0.5013
P value summary	ns
Significantly different (P < 0.05)?	No
Data analyzed
Sample size, column A	5
Sample size, column B	5

## Sheet: Figure 3C
			Control							3% DSS
CI	0.126535	0.017189	0.118023	0.13774	-0.26603			-0.00106	-0.16716	-0.05924	-0.09377	0.187772
CII	0.208279	-0.05132	0.185037	-0.10892	-0.27106			-0.07218	-0.06428	0.086332	-0.09132	0.179447
CIII	0.221619	0.118021	0.065692	-0.15858	-0.31579			-0.1717	-0.03996	0.073691	-0.11866	0.325666
CIV	-0.22063	-0.19982	0.393032	-0.04897	0.332974			-0.05172	-0.10804	-0.13738	-0.04103	0.081582
CV	0.017457	-0.00132	0.135035	0.039469	-0.1086			-0.01043	-0.22052	0.120651	-0.09808	0.126331
Table Analyzed	OXPHOS Complex Abundance_Full Fasta_Mean Summed Abundance								Below threshold?	P value	Mean of Control	Mean of 3% DSS	Difference	SE of difference	t ratio	df
								CI	No	0.597285	0.02669	-0.02669	0.05338	0.09705	0.5501	8
Column A	Control							CII	No	0.888965	-0.007597	0.0076	-0.0152	0.1054	0.1441	8
vs.	vs.							CIII	No	0.839174	-0.01381	0.01381	-0.02762	0.1317	0.2097	8
Column B	3% DSS							CIV	No	0.473033	0.05132	-0.05132	0.1026	0.1363	0.753	8
								CV	No	0.680557	0.01641	-0.01641	0.03282	0.07684	0.4271	8
Test details
Test name	Unpaired t test
Variance assumption	Individual variance for each row
Multiple comparisons	Set P value threshold
Method	No correction for multiple comparisons
Alpha	0.05
Number of tests performed	5
Number of rows omitted	0

## Sheet: Figure 3E
			Control							3% DSS
Acad9	0.110895	0.007742	0.026204	0.138656	-0.20557		Acad9	-0.17426	0.070555	-0.05219	0.002099	0.075868
Aifm1	0.495293	-0.20858	0.096923	0.288759	-0.3627		Aifm1	-0.1673	-0.45926	0.317455	-0.0418	0.041197
Ndufaf2	-0.69024	1.32264	0.810717	0.387124	-0.11315		Ndufaf2	-2.49319	-0.72768	1.94781	-1.03099	0.586968
Ndufa1	0.132624	-0.53318	0.447936	0.543216	0.081667		Ndufa1	-0.0218	-0.24384	-0.60215	-0.13738	0.332899
Ndufa10	0.015446	-0.13167	0.215618	0.105652	-0.15147		Ndufa10	-0.09015	-0.0088	-0.43196	0.13271	0.344623
Ndufa11	1.30672	0.679414	-0.02378	0.325631	0.444033		Ndufa11	-0.2479	-0.38598	-1.29357	-0.39818	-0.40638
Ndufa12	0.016211	-0.47837	0.260445	0.262882	-0.18187		Ndufa12	0.294441	-0.44841	0.16321	-0.05292	0.164391
Ndufa13	0.528313	-0.96372	0.16857	0.239216	0.203184		Ndufa13	-0.07715	-0.31357	0.237297	-0.25102	0.228877
Ndufa2	-0.51749	-0.42446	0.147264	0.170393	-0.50406		Ndufa2	0.064397	-0.22262	0.751521	0.152554	0.382507
Ndufa3	0.973477	1.15987	0.002563	-0.66872	-0.56979		Ndufa3	-0.60569	-0.04244	-0.38461	-0.14231	0.277636
Ndufa5	0.118437	0.191755	0.04287	0.296744	-0.0266		Ndufa5	0.282978	-0.24687	-0.5305	-0.19168	0.062875
Ndufa6	-0.2267	-0.47758	-0.11685	0.014305	-0.04255		Ndufa6	-0.12623	-0.04556	0.927038	-0.56109	0.655209
Ndufa7	-0.3383	-0.55437	0.246824	0.094006	-0.76045		Ndufa7	0.739394	-0.00791	0.485987	0.052661	0.04216
Ndufa8	-0.57888	0.0756	0.456068	-0.22521	-0.00235		Ndufa8	-0.21443	0.143731	-0.01147	-0.14981	0.506765
Ndufa9	0.72611	0.450201	-0.16966	0.083101	-0.00588		Ndufa9	-0.06997	-0.4448	-0.4111	-0.25307	0.095053
Ndufab1	0.196718	-0.08326	0.645169	-1.08312	0.468078		Ndufab1	0.759158	-0.22224	-0.29208	0.012676	-0.40109
Ndufb10	1.06617	0.448775	0.099972	0.283389	-0.23471		Ndufb10	0.028921	-0.65105	-0.53421	-0.54158	0.03432
Ndufb11	-0.08171	0.172392	-0.02219	-0.38094	0.26358		Ndufb11	0.131153	-0.47894	0.02012	0.11119	0.265353
Ndufb3	-1.21033	-0.09982	0.383184	0.127135	0.255381		Ndufb3	-0.18984	0.158531	-0.32564	0.349253	0.55215
Ndufb4	0.699466	-0.14566	0.133446	-0.12117	-0.1575		Ndufb4	-0.55294	-0.07283	0.137415	-0.3037	0.383486
Ndufb5	0.292486	-0.12887	0.255823	0.431173	0.582236		Ndufb5	0.283711	-0.73734	-0.66491	-0.17031	-0.144
Ndufb7	0.900235	-0.428	0.394753	-0.08796	0.11476		Ndufb7	0.000535	-0.27841	-1.18555	-0.02241	0.592051
Ndufb8	0.11768	-0.59063	0.014643	0.19273	-0.02842		Ndufb8	-0.0401	-0.40671	0.41881	0.044818	0.277176
Ndufb9	0.671339	-0.33034	-0.10682	-0.10953	-0.42573		Ndufb9	-0.15919	-0.13794	0.455049	0.084768	0.058392
Ndufc2	-2.6121	-0.01554	0.556875	0.298036	1.06561		Ndufc2	0.284876	-0.45091	0.410376	0.406649	0.056121
Ndufs1	0.126024	-0.09521	0.039866	0.00161	-0.22674		Ndufs1	-0.25606	-0.17059	0.529095	-0.07607	0.128085
Ndufs2	-0.19662	-0.4608	0.278594	-0.20407	-0.27562		Ndufs2	0.344955	0.100376	0.260761	0.028861	0.123568
Ndufs3	1.1583	-0.08528	-0.27901	0.082893	-0.14602		Ndufs3	-0.06687	-0.31031	0.084577	0.045399	-0.48368
Ndufs4	-0.3398	0.14496	0.294134	-0.59272	-0.29719		Ndufs4	-0.13351	0.19349	0.33748	0.240477	0.152674
Ndufs5	0.30997	0.283978	0.110304	0.31177	-0.37114		Ndufs5	-0.02612	-0.26628	-0.2248	-0.15587	0.028193
Ndufs6	-0.07078	0.445704	-0.32624	0.251354	-0.49849		Ndufs6	0.013451	-0.06298	-0.01194	0.165581	0.094337
Ndufs7	-0.07019	-0.90388	-0.00617	0.01777	-0.03415		Ndufs7	0.240665	-0.2134	0.654123	-0.23858	0.553803
Ndufs8	0.65628	0.686552	-0.16695	0.678832	-0.17787		Ndufs8	0.722672	-0.55889	-0.92749	-0.62448	-0.28865
Ndufv1	0.306322	0.153066	0.048602	-0.23469	-0.15861		Ndufv1	-0.07711	-0.12075	0.111995	-0.09147	0.062646
Ndufv2	0.390843	0.144241	-0.31068	0.401145	-0.17503		Ndufv2	-0.38328	-0.27568	0.286679	-0.12794	0.049701
Ndufv3	-0.24308	1.87388	-0.67463	2.1098	-0.22859		Ndufv3	-1.69352	0.689507	-1.23063	-1.27515	0.672419
Ndufv3	0.079015	0.60469	0.972235	1.06851	-6.84287		Ndufv3	0.804583	0.85705	0.777068	0.749153	0.930565

## Sheet: Figure 3F
			Control							3% DSS
Sdha	0.126818	0.095673	0.168918	-0.17134	-0.16118			-0.27216	-0.06851	0.15018	-0.14762	0.279211
Sdhb	0.289739	-0.19831	0.201155	-0.04651	-0.38095			0.127786	-0.06006	0.022483	-0.03502	0.079684

[truncated: 9 more sheets: Figure 3G, Figure 3H, Figure 3I, Figure 4A, Figure 4B, Figure 4C, Figure 4D, Figure 4E, Figure 4F]
